# Supplementary material
Source: ML conference proceedings conference paper supplement (https://openreview.net/forum?id=K7UkM0XXBQ)
Supplement: supplementary_material [file attachment]

# GaussianAvatar-Editor: Photorealistic Animatable Gaussian Head Avatar Editor

## Supplementary Material

### 7. Qualitative Results Gallery

For better visualization, we refer the reader to the video in the supplementary, including:

**Our results.** We provide more qualitative results in the video, including:

- Different edit prompts, shows edited results of different text prompts of the same avatar;
- Different avatars, shows edited results of the same text prompt of different avatars;
- Novel view, shows novel view rendering results of edited avatars;
- Novel pose, that animate the edited avatars using the source actor's video.

**Our ablation studies.** To make our GaussianAvatar-Editor self-contained, we also provide qualitative results to our ablation studies WABE in the video.

**Comparisons with baselines.** We provide more qualitative results with baselines from three takes in the video, including novel view rendering, self-reenactment, and cross-identity reenactment.
